# Supplementary material for: Aquatic and Semiaquatic Heteroptera (Hemiptera: Insecta) Distribution in Streams on the Cerrado–Amazon Ecotone in Headwaters of Xingu River
Source: MDPI journal article supplement (doi:10.3390/arthropoda1010004), 2022-09-13
Supplement: s1 [file s1]

**Table S1.** Environmental variables of the twelve streams located in the transition zone between the Amazon and Cerrado Biomes in headwaters of Xingu River, Brazil. [HII—habitat integrity index; EVI—enhanced vegetation index; NDVI—normalized difference vegetation index; pH—potential of hydrogen; Cond—conductivity; Turb—turbidity; AT—air temperature; WT—water temperature; DO—dissolved oxygen; Dep—depth; Wid—width; Nitr—nitrate; Pho—phosphorus; TH—total hardness; Ca—calcium; Mg—magnesium].

| Streams names          | Abbreviations | HII  | EVI   | NDVI | pH   | Cond | Turb | AT | WT   | DO  | Dep  | Wid  | Nitr | Pho  | TH    | Ca    | Mg   | Land use    |
|------------------------|---------------|------|-------|------|------|------|------|----|------|-----|------|------|------|------|-------|-------|------|-------------|
| Brejão stream          | CRBJ          | 0.71 | 0.442 | 0.57 | 5.13 | 0.8  | 2.3  | 30 | 23.7 | 8.5 | 0.73 | 100  | 0.1  | 0.3  | 3.36  | 0.96  | 2.4  | Agriculture |
| Lúcio stream           | CRL           | 0.74 | 0.404 | 0.54 | 4.59 | 0.6  | 42   | 28 | 22.5 | 8.4 | 0.77 | 3.42 | 0.3  | 0.08 | 2.92  | 0.96  | 1.96 | Forest      |
| Sucuri stream          | CRSRI         | 0.6  | 0.517 | 0.57 | 4.86 | 0.9  | 88.1 | 33 | 25.5 | 7.5 | 0.83 | 100  | 0.4  | 0.05 | 3.49  | 1.4   | 2.09 | Agriculture |
| Transição-brejo stream | CRTB          | 0.39 | 0.38  | 0.52 | 4.11 | 1    | 49.9 | 31 | 23.8 | 9.9 | 0.2  | 1.37 | 0.3  | 0.03 | 3.27  | 1.09  | 2.18 | Agriculture |
| Betis river 1          | RIBET1        | 0.64 | 0.438 | 0.71 | 5.37 | 1.2  | 110  | 26 | 24.3 | 7.3 | 0.31 | 1.27 | 0.6  | 0.11 | 4.14  | 1.09  | 3.05 | Agriculture |
| Betis river 2          | RIBET2        | 0.49 | 0.429 | 0.56 | 5.67 | 1.3  | 67.8 | 26 | 24.2 | 6.1 | 0.12 | 4.83 | 0.4  | 0.04 | 4.58  | 1.74  | 2.83 | Agriculture |
| Darro river            | RID           | 0.69 | 0.037 | 0.09 | 4.62 | 0.6  | 52.3 | 33 | 25.7 | 6.3 | 3.42 | 100  | 0.4  | 0.06 | 3.79  | 0.92  | 2.88 | Forest      |
| Piabanha river         | CRPB          | 0.65 | 0.424 | 0.55 | 4.47 | 0.3  | 65.3 | 31 | 23.9 | 9.8 | 1.07 | 5.96 | 0.4  | 0.08 | 2.75  | 0.87  | 1.87 | Forest      |
| Suiá-Missu river 1     | RISU1         | 0.58 | 0.369 | 0.49 | 4.97 | 0.5  | 50.4 | 31 | 23.5 | 8.6 | 1.32 | 1.32 | 0.4  | 0.06 | 19.18 | 15.26 | 3.92 | Forest      |
| Suiá-Missu river 2     | RISU2         | 0.67 | 0.332 | 0.46 | 4.5  | 0.4  | 63.4 | 29 | 23.4 | 9.7 | 1.43 | 9.66 | 0.3  | 0.04 | 2.88  | 0.96  | 1.92 | Forest      |
| Suiá-Missu river 3     | RISU3         | 0.73 | 0.417 | 0.47 | 4.86 | 0.9  | 88.1 | 27 | 25.5 | 7.5 | 3.4  | 73   | 0.3  | 0.07 | 3.49  | 1.53  | 1.96 | Forest      |
